# Supplementary material
Source: PubMed Central journal article supplement (PMC7202371)
Supplement: NIHMS1582030-supplement-Supp2.pdf [file NIHMS1582030-supplement-Supp2.pdf]

## **SUPPLEMENTARY DATA**

**Supplementary Fig. 1: LGG is not radioprotective of the bone marrow.** (A, B) Mice received fractionated TBI (4Gy X 4 days). LGG was given by gavage on 6 consecutive days; 2 days before radiation and at 1h before each radiation dose. Mice were sacrificed 24 hours after the last dose of irradiation and the number of (A) CD4<sup>+</sup> and (B) CD8<sup>+</sup> cells in the peripheral blood was assessed. Pre-treatment with LGG had no effect on the number of surviving CD4<sup>+</sup> or CD8<sup>+</sup> cells. Data are means  $\pm$  SEM for 3 mice per treatment group.

\*\*\*P<.0001 compared with unirradiated control. (C) Mice were gavaged on 3 consecutive days with LGG, or LTA, or drinking water followed by a single dose of 4Gy TBI. 24 hours later the femurs were analyzed for the number of surviving CD34<sup>+</sup> bone marrow stem cells. Data are means  $\pm$  SEM for 3 mice per treatment group.

## **SUPPLEMENT METHODS**

### **Enteroid culture and assessment of proliferation**

Small intestinal enteroid cultures from WT C57BL/6 mice were established and maintained per published protocols.[19, 20] A 1-cm<sup>2</sup> segment of ileal tissue was removed and washed in DMEM/F12 containing 10% FBS to inactivate endogenous proteases. The tissue was then minced with fine sterile scissors, incubated with collagenase for 10 min with vigorous pipetting every 5 min, filtered using a 40  $\mu$ m cell strainer, and then washed once with DMEM/F12 in a 15 ml centrifuge tube. The pellet was resuspended in DMEM/F12 and centrifuged at 200 g for 5 min. The pellet was then resuspended in Matrigel. Matrigel (15  $\mu$ l) containing the epithelial cells was placed in the center of each well of a 24-well plate and incubated in a tissue culture incubator for 10 min upside down to avoid the cells attaching to the bottom of the plate. After this incubation, 500  $\mu$ l of 50% L-WRN conditioned media (containing Wnt3a, Noggin, and R-spondin) supplemented with 10  $\mu$ M Y27632 and 10  $\mu$ M SB431542 was added. Experiments were performed using purified epithelial spheroid populations.

Cell proliferation was assessed using two methods. First, the 3-(4,5-dimethylthiazol-2,5-diphenyltetrazolium bromide (MTT) cell proliferation assay kit (ATCC, Manassas, VA) was used to measure cell growth as we have previously described with the following modifications.[15, 20] Cells were pretreated with lipoteichoic acid (LTA, from Staphylococcus aureus, 10 $\mu$ g/ml) or vehicle in medium for 2 hours, then irradiated with zero, 4, 8, or 12 Gy. LTA or vehicle was removed 2 hours post irradiation, and cells were cultured for 72 hours, and proliferation was assessed by MTT incorporation using a Biotek Synergy 2 microplate reader (Winooski, VT).

In later experiments, the CCK-8 proliferation assay (Dojindo Molecular Technologies, Inc) was used to measure cell proliferation. WT enteroids were plated in 50% CM for 12h, then grown in 5% CM supplemented with 10  $\mu$ M Y27632 for 24h. Enteroids were then treated with the indicated compounds for 1h in 5% CM, followed by 6Gy irradiation. Culture medium was immediately replaced with 50% CM and enteroids were grown for 48h. Proliferation was measured by CCK-8 proliferation assay (Dojindo Molecular Technologies, Inc). Absorbance was measured using a Biotek Synergy 2 microplate reader (Winooski, VT).

In another set of experiments, ileum enteroids or small intestine mesenchymal stem cells (MSC) were incubated in media alone, or in media containing LTA (10 $\mu$ g/ml) or indomethacin (50 $\mu$ M), or NS398 (5 $\mu$ M). Conditioned media was collected after 24h incubation and PGE<sub>2</sub> concentration was determined by a PGE<sub>2</sub>-specific enzyme-linked immunoassay according to the manufacturer's directions.

### **LTA and Bone Marrow Protection**

C57BL/6J mice were given vehicle or LTA by gavage on 2 consecutive days before the start of the fractionated irradiation protocol. Thereafter, mice received 4Gy TAI on 4 consecutive days and vehicle or LTA by gavage at 1h before each radiation dose and were sacrificed 24h after the final radiation dose. Equal volumes (50 $\mu$ l) of peripheral blood from mice in each treatment group were analyzed for CD4<sup>+</sup> and CD8<sup>+</sup> by flowcytometry. C57BL/6J mice were given vehicle or LTA by gavage on 3 consecutive days. Mice received a single dose of 4Gy TBI at 1h after the final gavage and were sacrificed 24h later. Bone marrow was obtained from femurs and equal numbers of cells (1 X 10<sup>6</sup>) from each treatment group were analyzed for CD34<sup>+</sup> cells by flow cytometry.
